# Supplementary material for: The Evolution of the Antimicrobial Resistance of Streptococcus pneumoniae in Tunisia: A Multicentric Analysis over Two Decades (2000–2019)
Source: MDPI journal article supplement (doi:10.3390/antibiotics14020171), 2025-02-10
Supplement: s1 [file s1]

**(a)**

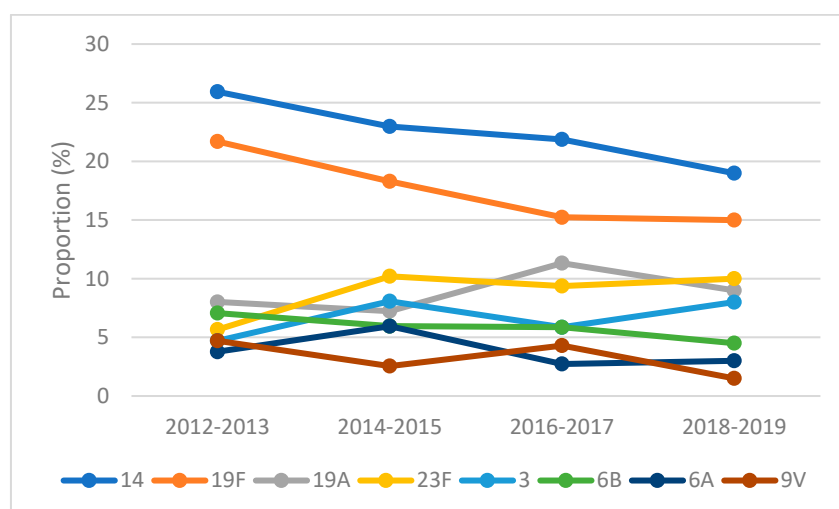

**(b)**

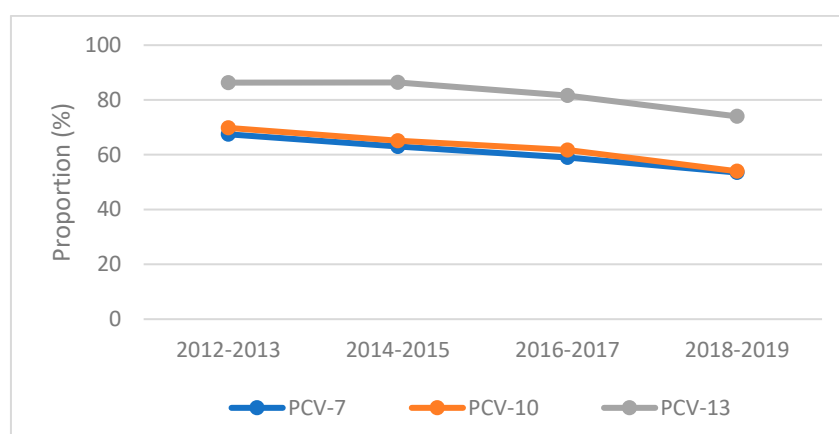

**Figure S1. Evolution of serotype distribution (a) and pneumococcal vaccine coverage (b) over the study period**
